# Supplementary material for: Distinct functional levels of human voice processing in the auditory cortex
Source: PubMed Central journal article supplement (PMC9930621; doi:10.1093/cercor/bhac128), 2022-03-26

## Supplemental material

Distinct functional levels of human voice processing in the auditory cortex  
Matthias Staib, Sascha Frühholz

### Supplemental figures

**Figure S1. Replication of neural activations analyses with a smoothing kernel of  $4\text{mm}^3$  isotropic smoothing.** (a) Replication of the analysis as reported in Fig. 2a (left panel). (b) Replication of the analysis as shown in 2b (left upper panel).

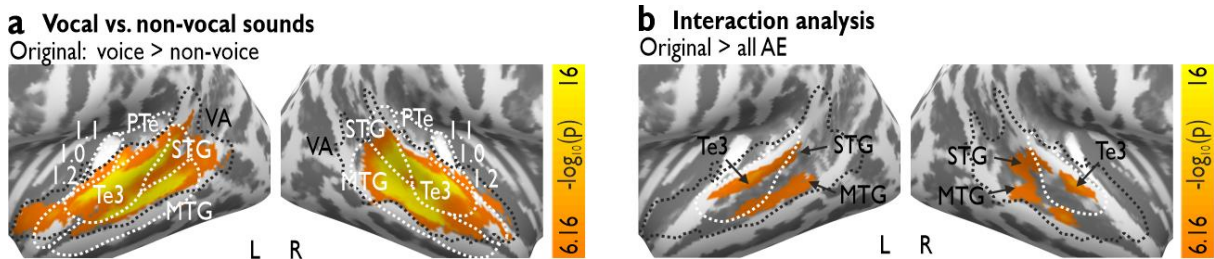

**Figure S2. Quantification of response magnitude and voice-selectivity.** (a) Voxel-wise voice-selectivity across participants. The map shows the consistence of voice-selectivity across participants, ranging from 1 to 25 ( $n=25$  is the potential maximum given the sample size). (b) Same map as in (a), but thresholded to show voxels for which consistency was found for at least  $n=11$  participants; maximum number of participants showing consistency in the maximum voxel was  $n=13$ , no voxel showed higher values.

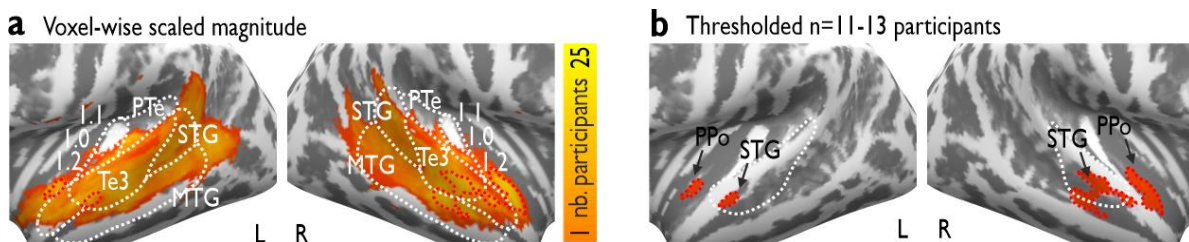

Supplement: staibfruhholz_cercor2022_supplement_bhac128.pdf [file staibfruhholz_cercor2022_supplement_bhac128.pdf]
